# Supplementary material for: Identification of Allelic Imbalance with a Statistical Model for Subtle Genomic Mosaicism
Source: PLOS journal article supplement (doi:10.1371/journal.pcbi.1003765), 2014-08-28
Supplement: S4 (10.1371/journal.pcbi.1003765.s004) [file journal.pcbi.1003765.s004]

|        | computational dilut. |      |      |      | lab dilut. |      |
|--------|----------------------|------|------|------|------------|------|
|        | 3%                   | 5%   | 7%   | 9%   | 10%        | 21%  |
| Naive  | 0.60                 | 0.67 | 0.73 | 0.78 | 0.85       | 0.97 |
| J-LOH  | 0.76                 | 0.86 | 0.92 | 0.94 | 0.95       | 0.99 |
| hapLOH | 0.75                 | 0.84 | 0.90 | 0.93 | -          | -    |

Table S1: **Accuracy of various methods for inferring over-represented alleles.** At a heterozygous marker in allelic imbalanced regions, either allele “A” or “B” is over-represented in the tumor. We compare the accuracy for inferring over-represented alleles in the tumor. Accuracy is defined as the proportion of heterozygous markers in AI regions where the over-represented alleles are inferred correctly. The true over-represented alleles are ascertained from dichotomizing BAFs in AI regions in pure tumor cell line. The naive method selects the allele by comparing the mixture BAF to 0.5. Both J-LOH and hapLOH infer with enhanced accuracy.
